# Supplementary material
Source: HighWire-hosted journal article supplement (http://thorax.bmjjournals.com/highwire/filestream/174130/field_highwire_adjunct_files/3/JBSupplementary_Figure_2.pdf)
Supplement: JBSupplementary_Figure_2.pdf [file JBSupplementary_Figure_2.pdf]

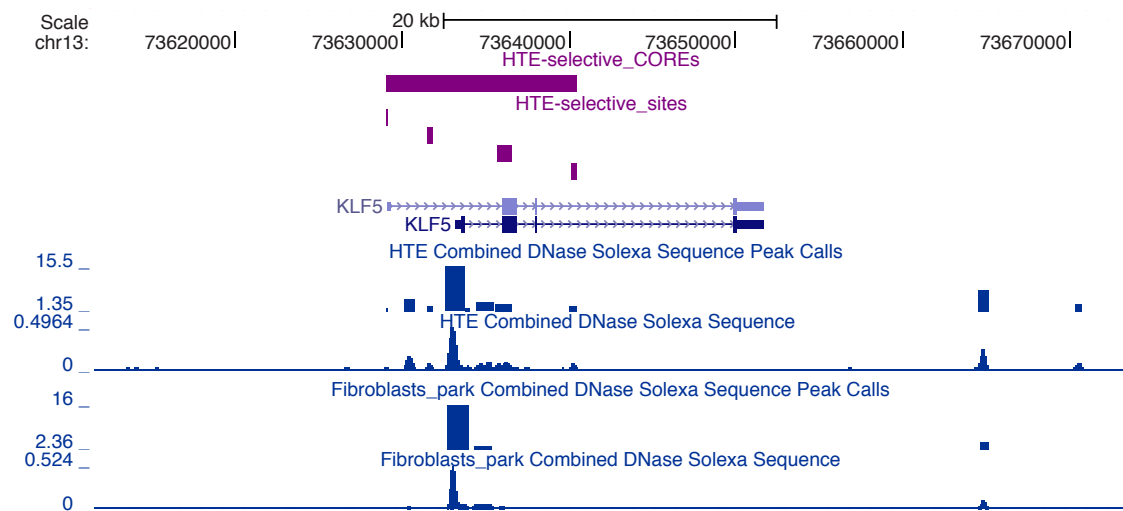

**Supplementary Figure 2. A CORE of open chromatin associated with the KLF5 gene promoter in human tracheal epithelial cells.**

A region of the human genome encompassing the KLF5 gene is shown on the UCSC genome browser (<http://genome.ucsc.edu>) with combined DNase Solexa sequence data and peak calls for 2 biological replicates of human tracheal epithelial cells (HTE) and skin fibroblasts (Fibroblasts\_park). Above these tracks are HTE-selective COREs (horizontal purple bars, HTE-selective COREs), HTE-selective DHS (vertical purple bars, HTE-selective-sites).
